# Supplementary material for: p-Toluenesulfonic acid functionalized imidazole ionic liquids encapsulated into bismuth SBA-16 as high-efficiency catalysts for Friedel–Crafts acylation reaction
Source: Royal Society of Chemistry journal article supplement (doi:10.1039/d1dt00355k), 2021-01-01
Supplement: d1dt00355k1.pdf [file d1dt00355k1.pdf]

## Supporting Information

### ***P*-toluenesulfonic acid functionalized imidazole ionic liquids encapsulated into bismuth SBA-16 as the high-efficiency catalyst for Friedel–Crafts acylation reaction**

Guofang Gao, Qian Zhao, Chen Yang, Tingshun Jiang\*

School of Chemistry and Chemical Engineering, Jiangsu University, Zhenjiang

212013, P. R. China

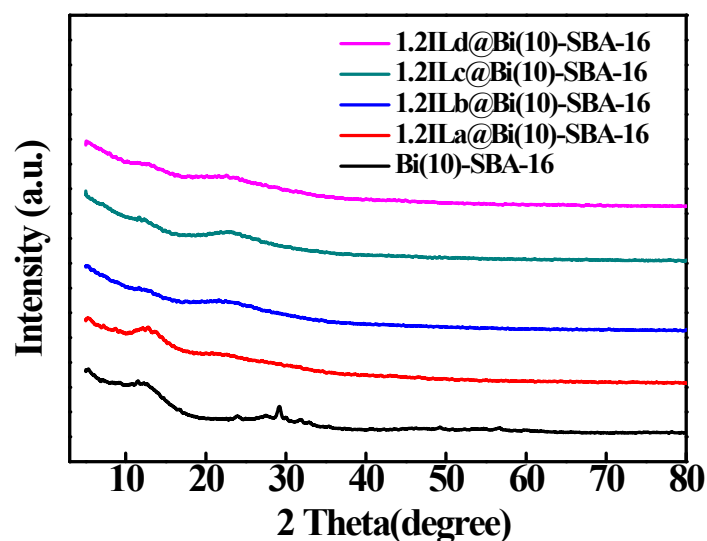

Fig. S1 Wide-angle XRD patterns of Bi(10)–SBA-16 catalysts and 1.2ILs@Bi(10)-SBA-16.

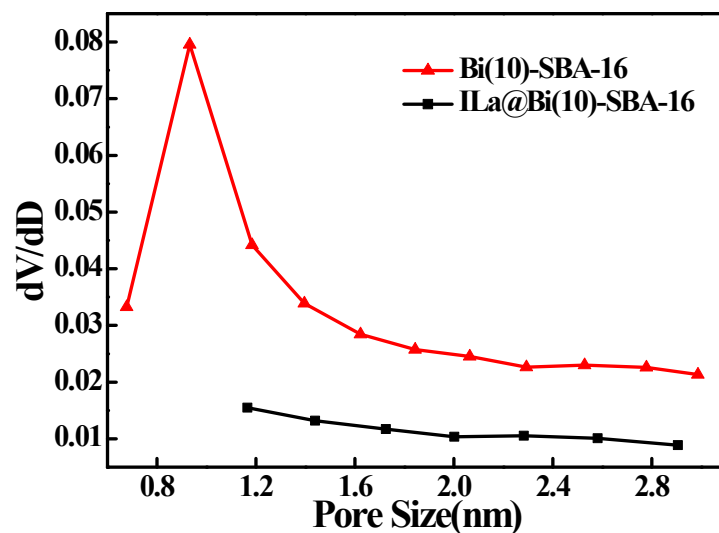

Fig. S2 N<sub>2</sub> adsorption-desorption isotherms and pore size distribution of microporous pore size distribution of Bi(10)-SBA-16 and ILa@Bi(10)-SBA-16.

(A)

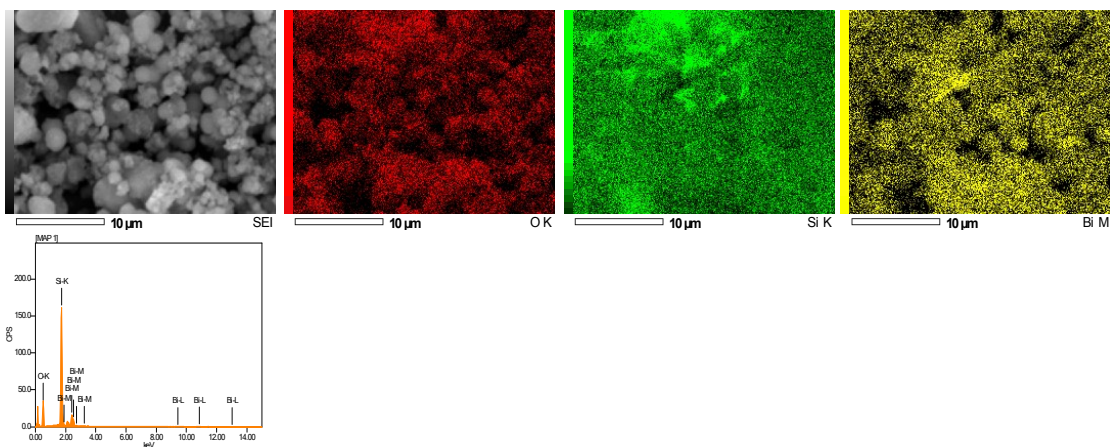

(B)

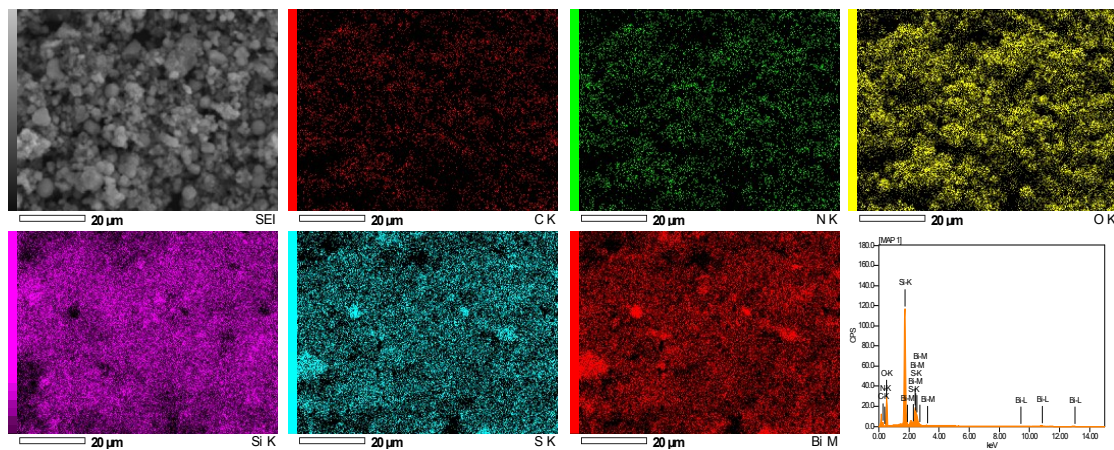

(C)

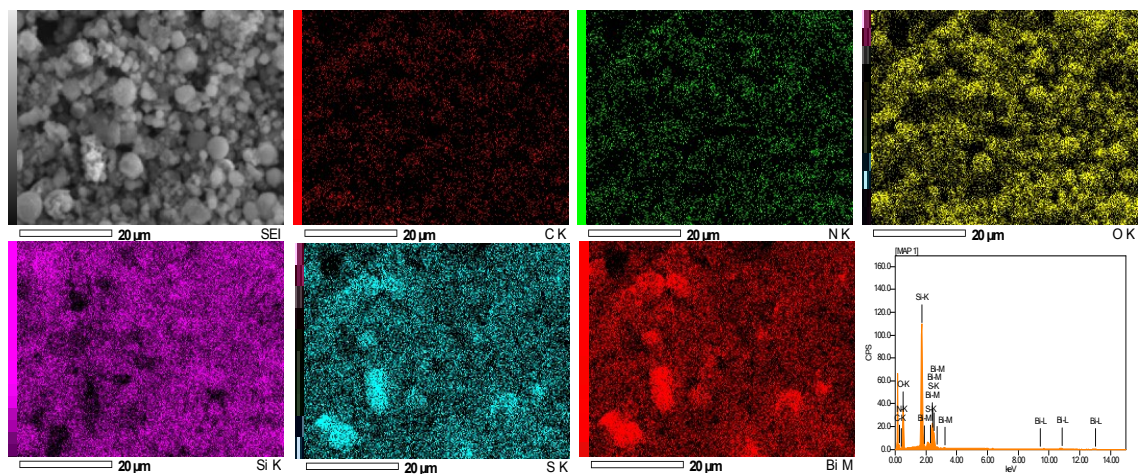

(D)

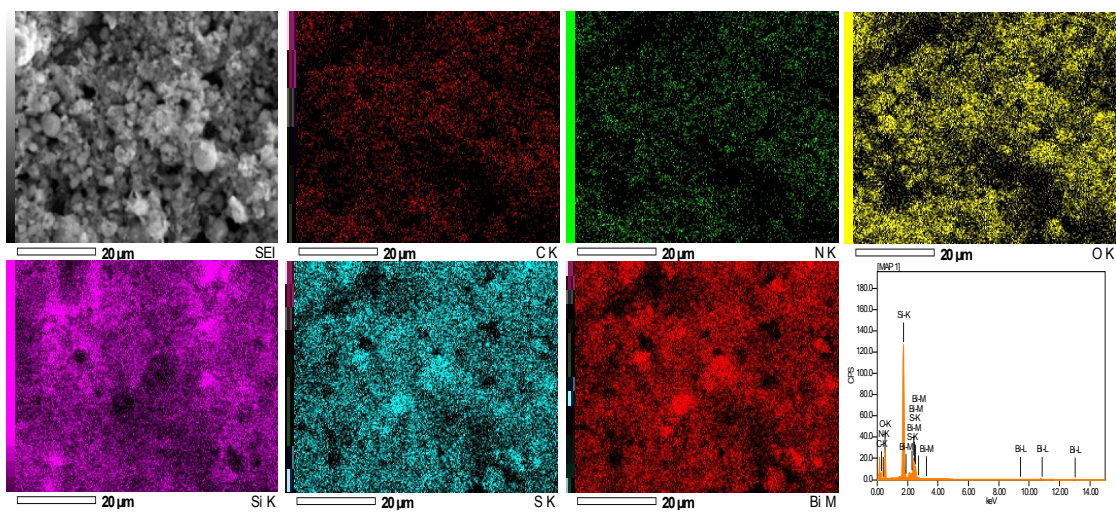

(E)

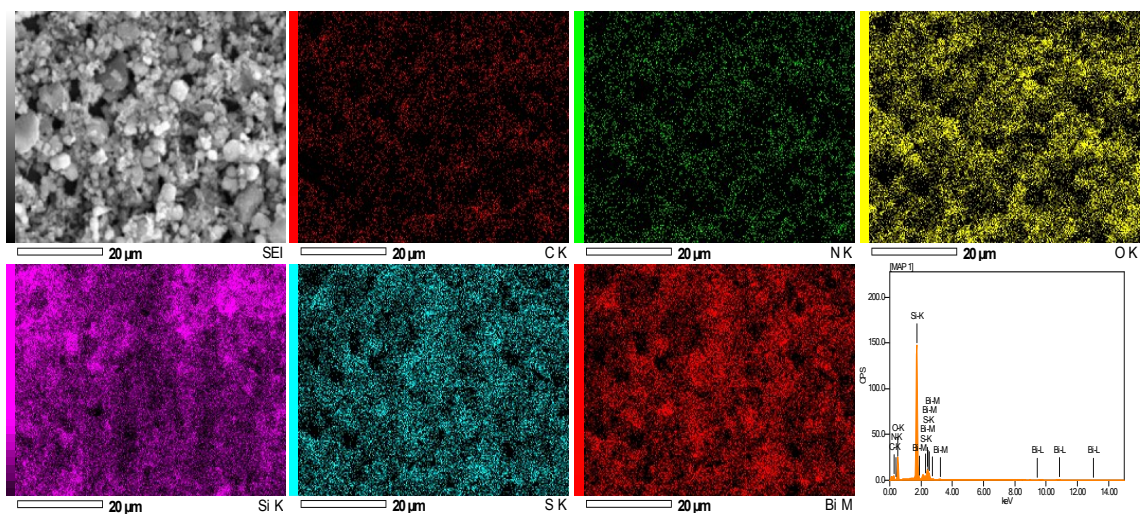

Fig. S3 The EDS spectra of (A) Bi(10)-SBA-16, (B) 1.2ILa@ Bi(10)-SBA-16, (C) 1.2ILb@ Bi(10)-SBA-16, (D) 1.2ILc@ Bi(10)-SBA-16, (E) 1.2ILd@ Bi(10)-SBA-16.

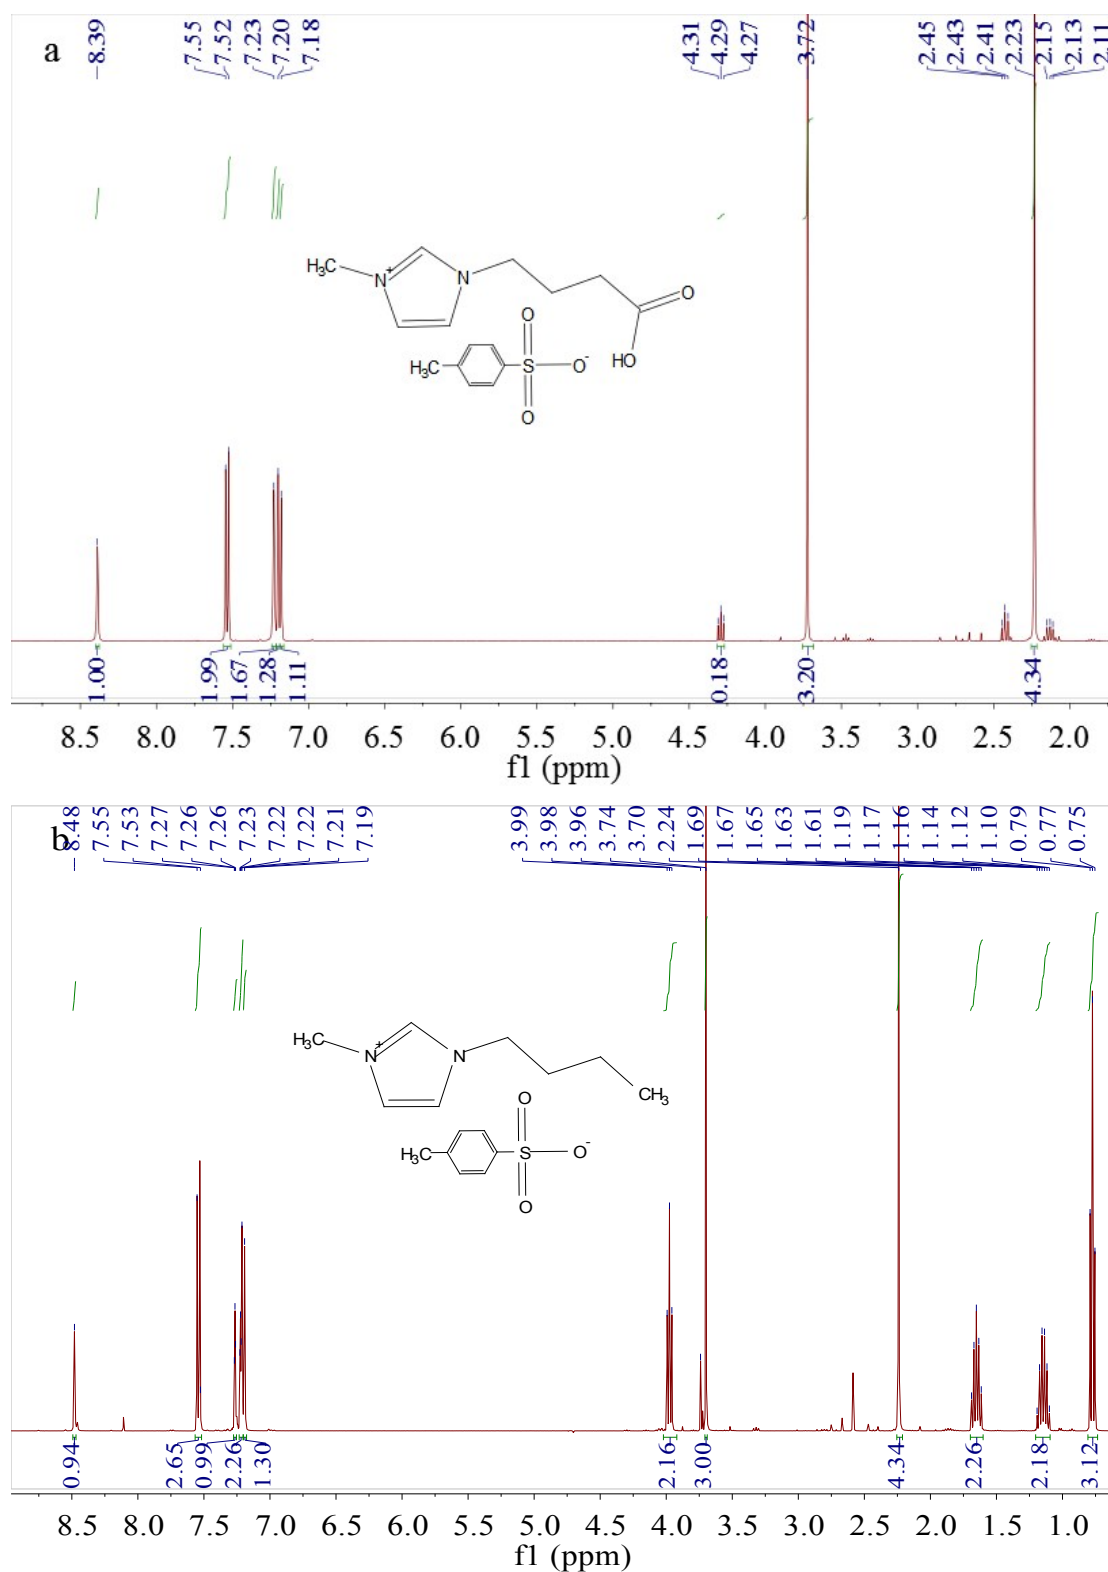

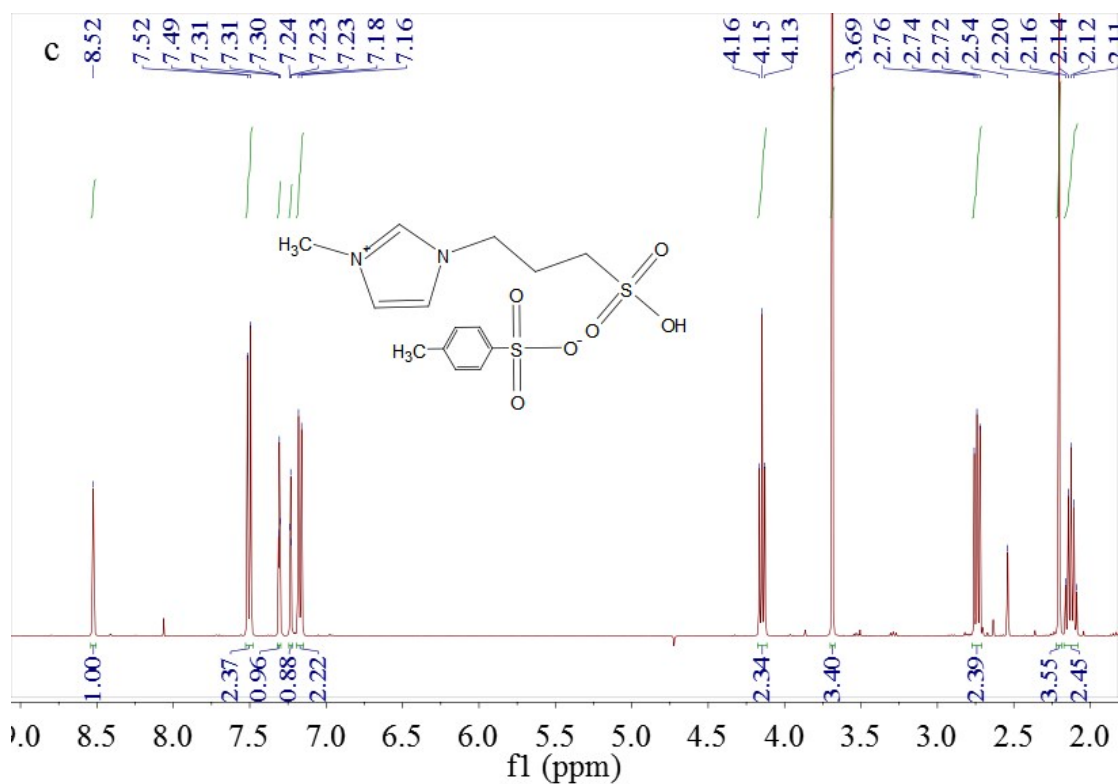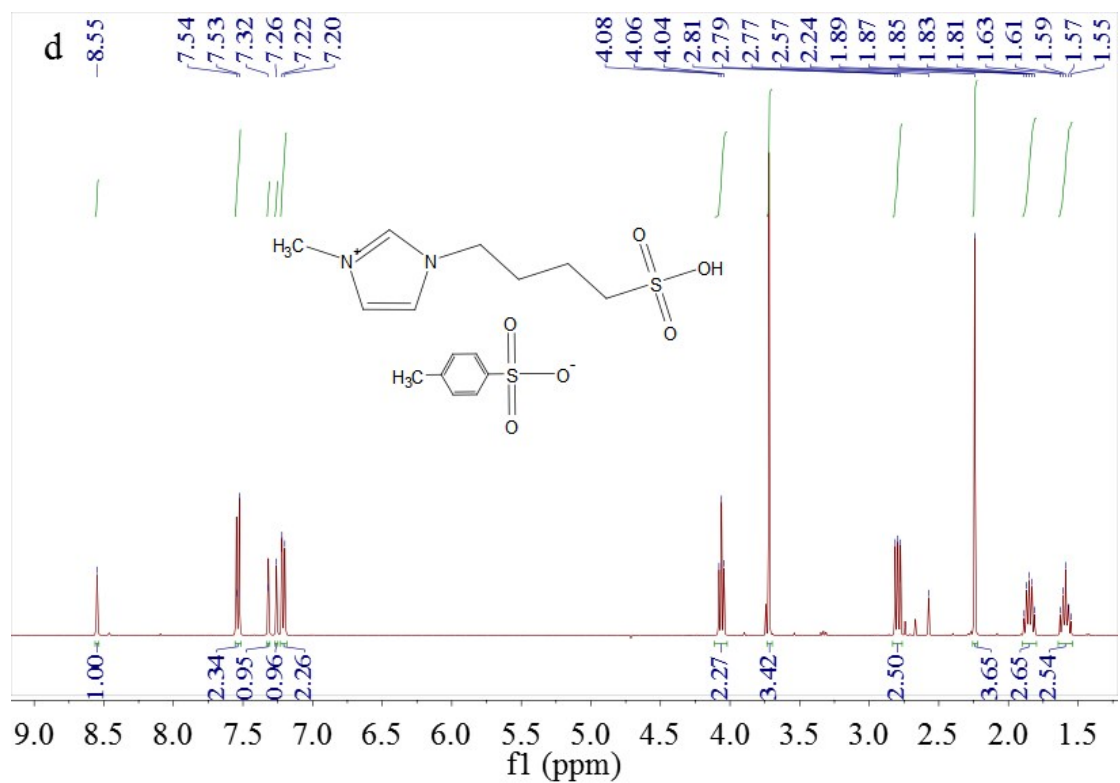

Fig. S4  $^1\text{H}$  NMR spectrum of (a) ILa, (b) ILb, (c) ILc, (d) ILd in  $\text{D}_2\text{O}$ .

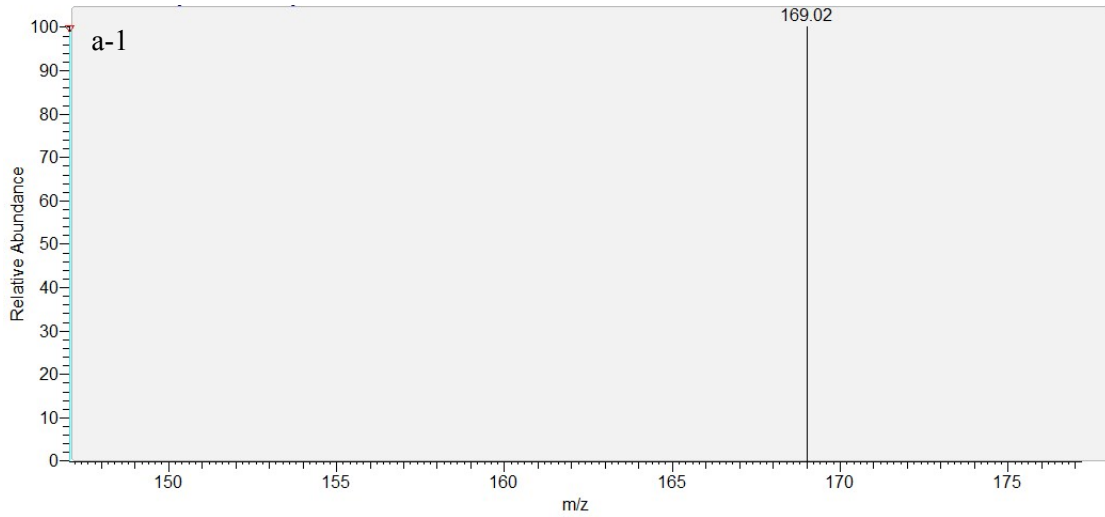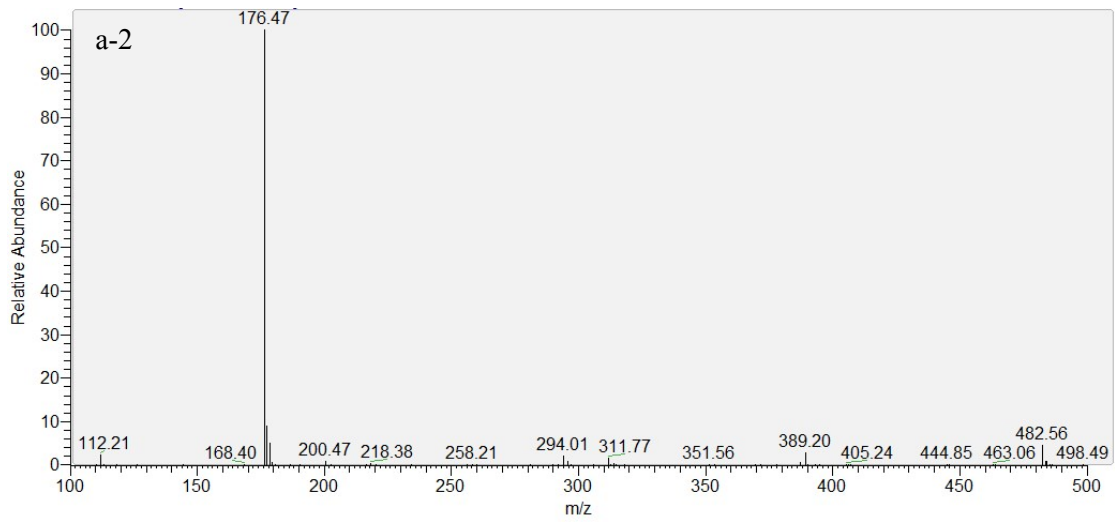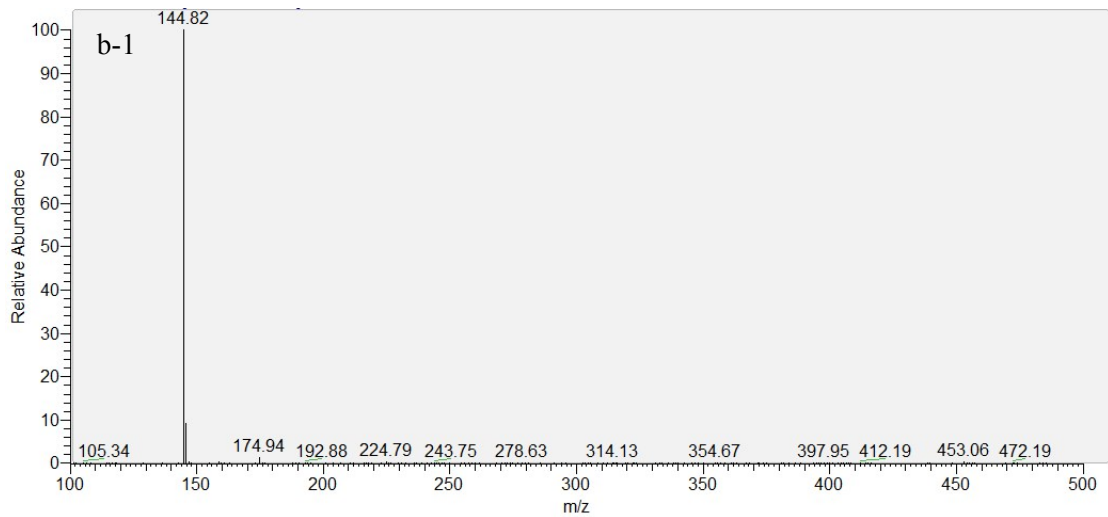

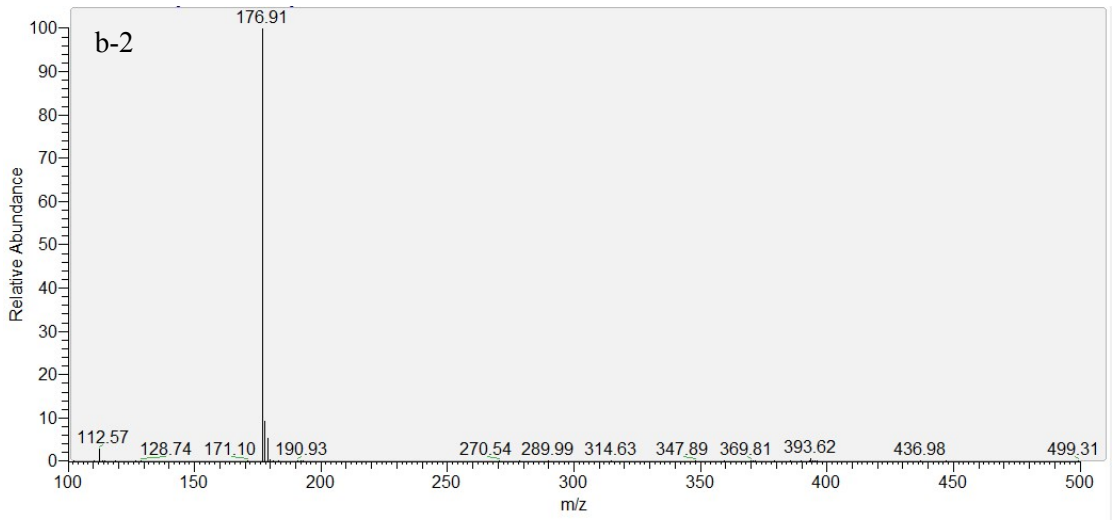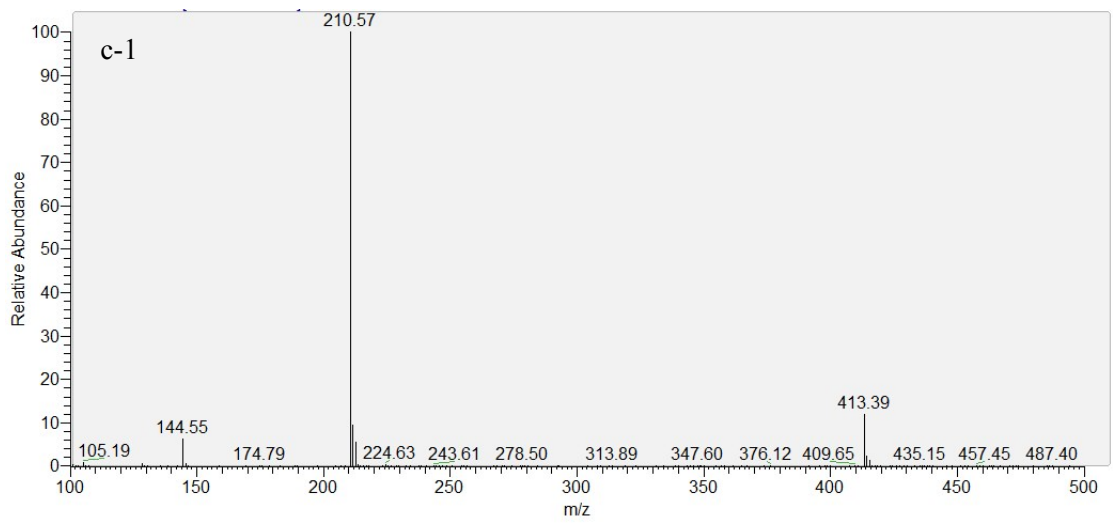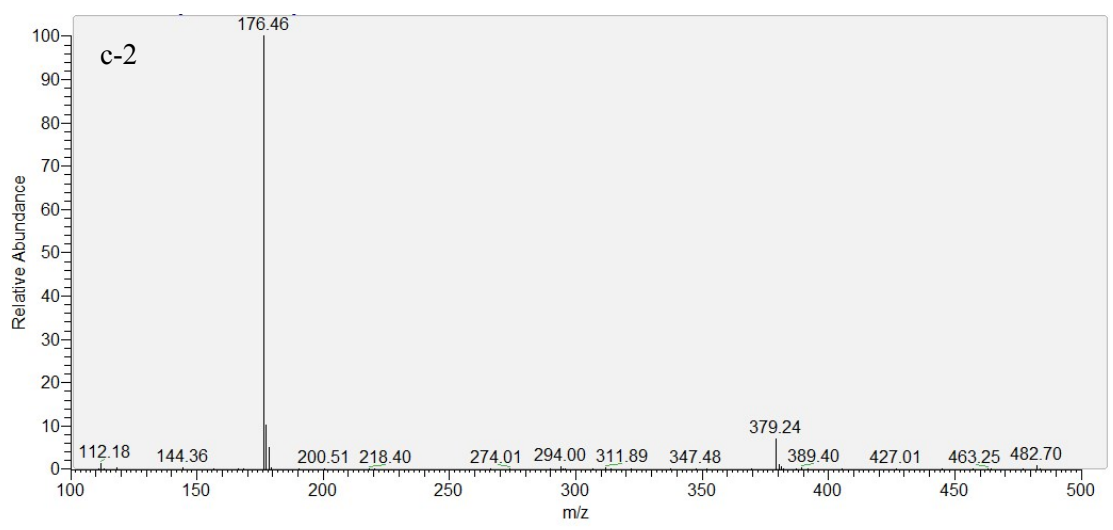

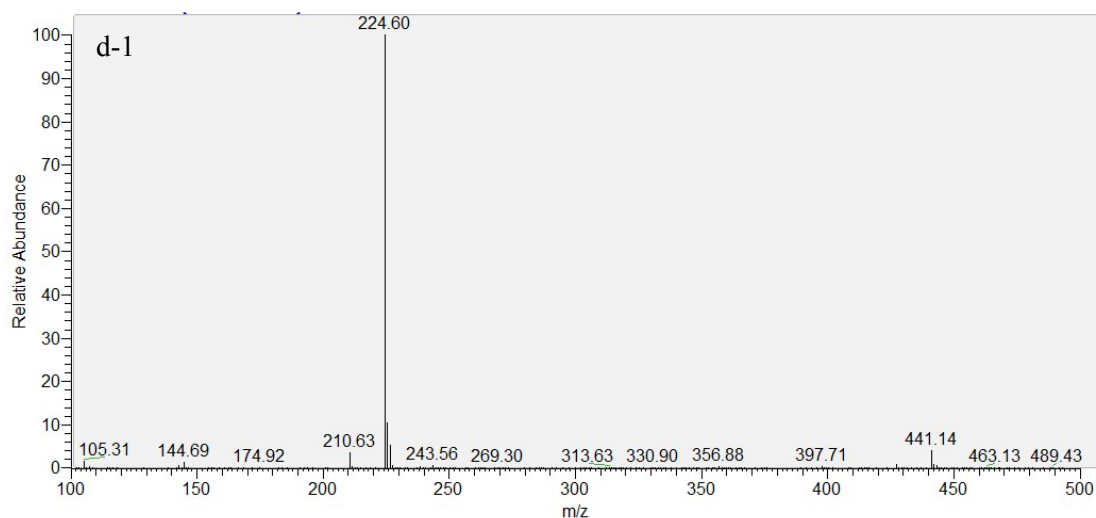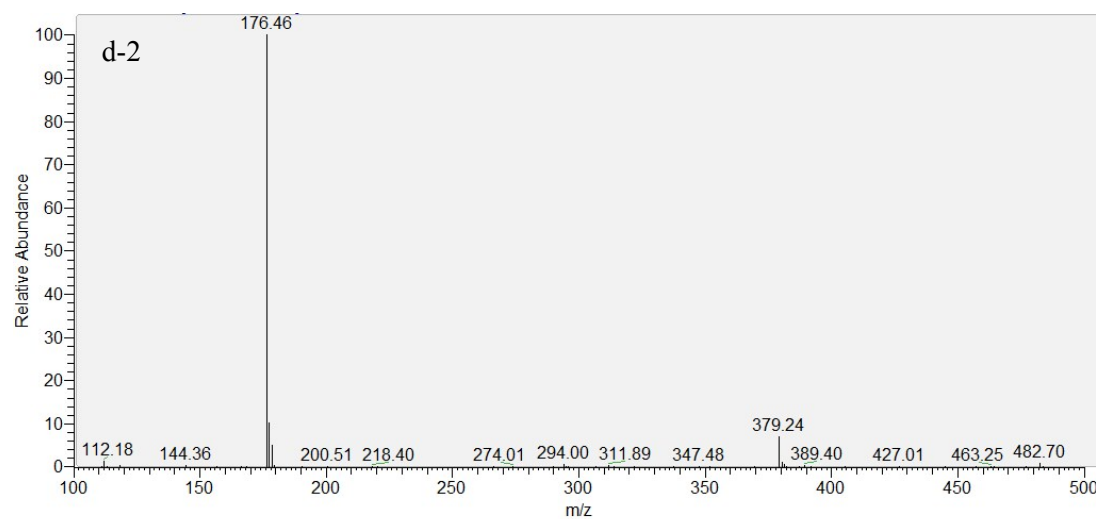

Fig. S5 GC-MS spectrum of (a) ILa , (b) ILb, (c) ILc, (d) ILd.



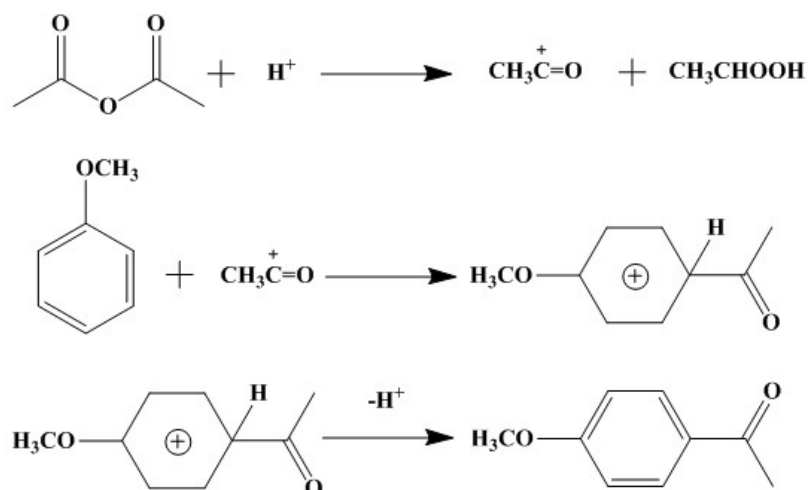

Fig. S6 Reaction mechanism diagram of anisole and acetic anhydride.

Table S1. Comparison of catalytic performance of various catalysts in the Friedel–Crafts acylation.

| Catalyst                                      | Conditions                                                                                         | Conversion% | References |
|-----------------------------------------------|----------------------------------------------------------------------------------------------------|-------------|------------|
| HPW/MCM-41<br>(60% loading)                   | 0.1 g of catalyst, The mole ratio of anisole to acetic anhydride was 4:1, at 120 °C, for 1 h.      | 44.2        | 1          |
| Nanocrystalline ZSM-5 of 90 nm particle sizes | 0.2 g of catalyst, The mole ratio of anisole to acetic anhydride was 8:1, at 100 °C, for 5 h.      | 66.2        | 2          |
| HPA/SiO <sub>2</sub>                          | 170 mg of catalyst, The mole ratio of anisole to acetic anhydride was 10:1, at 90 °C, for 250 min. | 65          | 3          |
| 20%IL/MIL-101                                 | 0.5 g of catalyst, The mole ratio of anisole to acetic anhydride was 1:1, at 80 °C, for 1 h.       | 78.9        | 4          |

## References:

- [1] S. K. Abd El Rahman, H. M. Hassan, M.S. El-Shall, *Appl. Catal. A: General*, 2012, 411, 77-86.
- [2] R. Selvin, H. L. Hsu and T. M. Her, *Catal. Commun.*, 2008, 10, 169-172.
- [3] B. B. Baeza and J. Anderson, *J. Catal.*, 2004, 228, 225-233.
- [4] M. A. Hassan, A. Mohamed, Betiha, S. K. Mohamed, E.A. El-Sharkawy and E. A. Ahmed, *J. Mol. Liq.*, 2017, 236, 385-394.
